# Supplementary material for: A compressible and hierarchical porous graphene/Co composite aerogel for lithium-ion batteries with high gravimetric/volumetric capacity
Source: Royal Society of Chemistry journal article supplement (doi:10.1039/c6ta00064a), 2016-01-01
Supplement: c6ta00064a1.pdf [file c6ta00064a1.pdf]

## *Supporting Information*

Compressible and hierarchical porous graphene/Co  
composite aerogel for lithium-ion battery with high  
gravimetric/volumetric capacities

*Hailiang Cao, Xufeng Zhou,\* Wei Deng and Zhaoping Liu\**

Advanced Li-ion Battery Engineering Lab, Ningbo Institute of Materials Technology  
and Engineering (NIMTE), Chinese Academy of Sciences, Zhejiang, 315201, China.

Corresponding author e-mail: liuzp@nimte.ac.cn; zhouxf@nimte.ac.cn

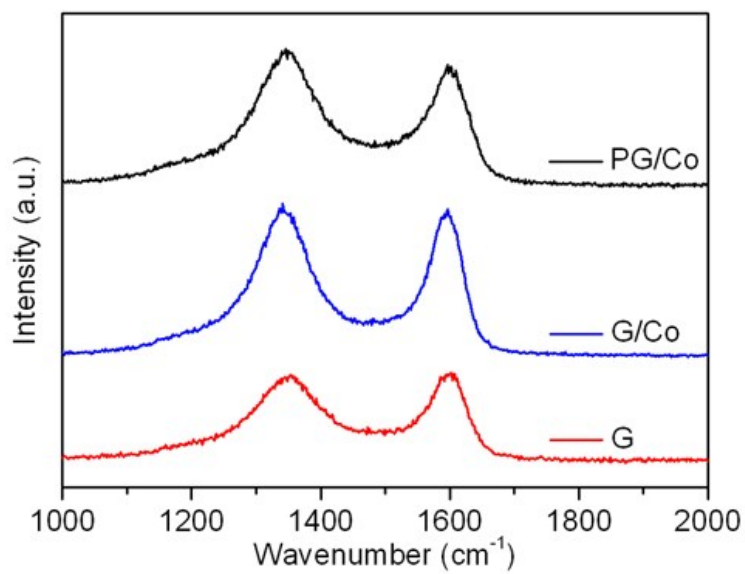

Fig. S1 Raman spectra of G, G/Co, and PG/Co aerogels.

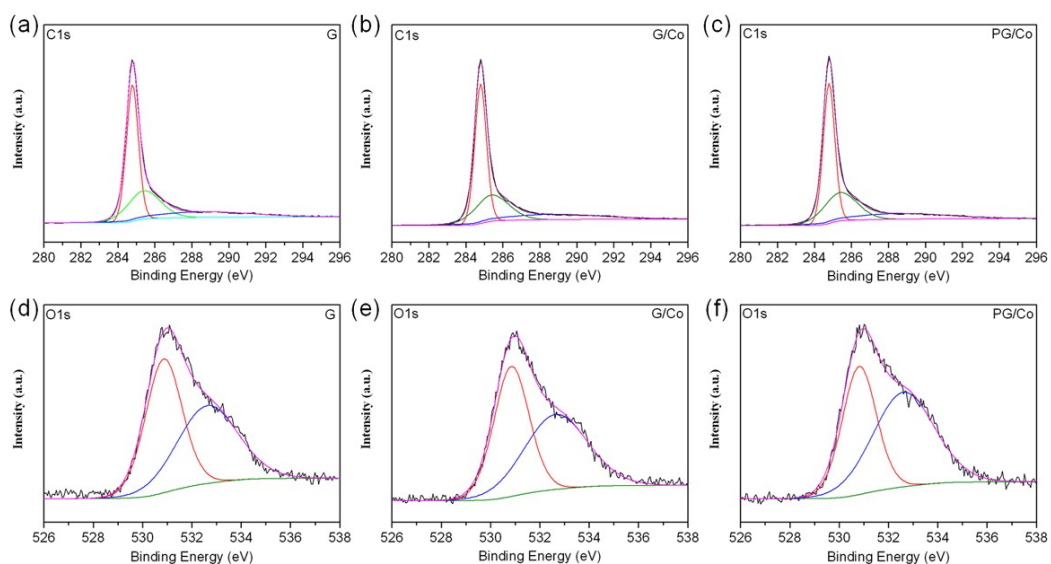

Fig. S2 C1s (a-c) and O1s (d-f) peaks in the XPS spectra of the G, G/Co, and PG/Co aerogels.

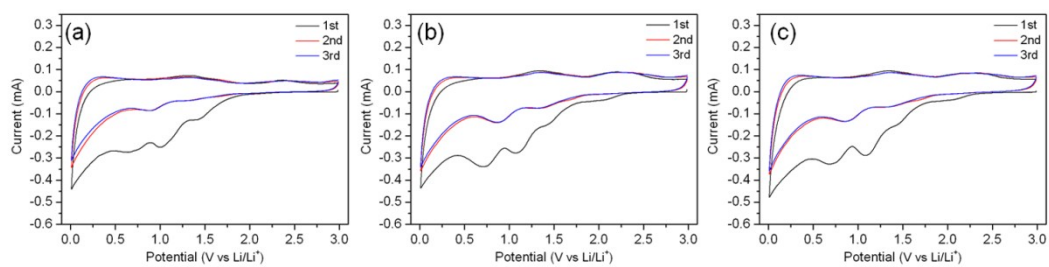

Fig. S3 CV profiles of G (a), G/Co (b) and PG/Co (c) aerogels at a scan rate of  $0.1 \text{ mV S}^{-1}$ .

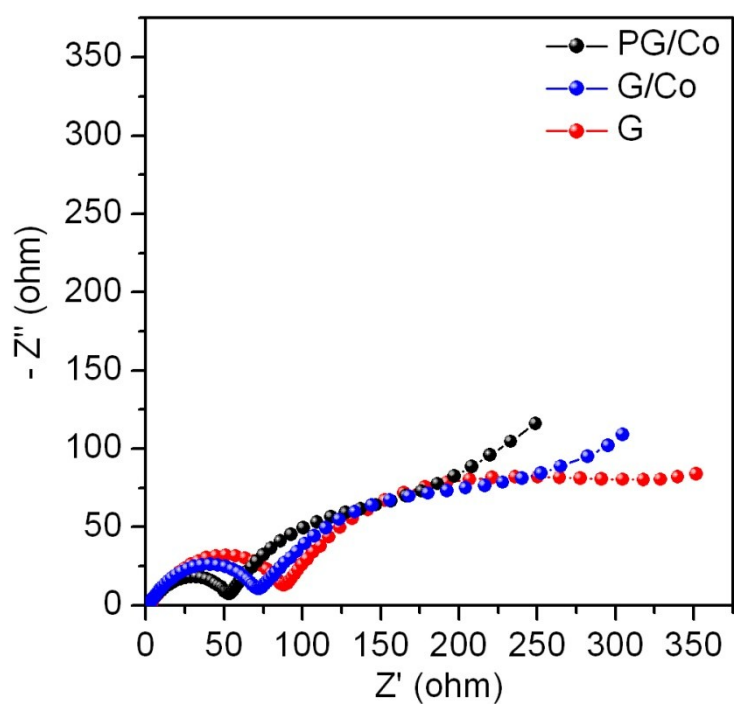

Fig. S4 Nyquist plot for the G, G/Co and PG/Co electrodes.

Table S1 Values of equivalent circuit elements obtained by EIS.

| Sample | $R_s (\Omega)$ | $R_{SEI} (\Omega)$ | $R_{ct} (\Omega)$ |
|--------|----------------|--------------------|-------------------|
| G      | 2.8            | 96.9               | 285.6             |
| G/Co   | 2.1            | 73.4               | 148.1             |
| PG/Co  | 1.7            | 54.2               | 105.1             |
